# Supplementary material for: Evaluating a habitat template model's predictions of marine fish diversity on the Scotian Shelf and Bay of Fundy, Northwest Atlantic
Source: Oxford University Press journal article supplement (doi:10.1093/icesjms/fsr147), 2011-09-22
Supplement: fsr147supp.doc [file fsr147supp.doc]

# **Supplementary material: ICES Journal of Marine Science, 68**

**Evaluating a habitat template model’s predictions of marine fish diversity on the Scotian Shelf and Bay of Fundy, Northwest Atlantic**

Jonathan A. D. Fisher, Kenneth T. Frank, Vladimir E. Kostylev, Nancy L. Shackell, Tracy Horsman,

and Charles G. Hannah

**Table S1**. Variation in eight observed life history traits among the 30 most frequently occurring marine fish species.

| **Species** | **Maximum length (cm)** | **Maximum mass (g)** | **Maximum age (years)** | **Egg guarder? (0 = none, 1 = some, 2 = internal development)** | **Geometric mean fecundity** | **Mean egg diameter (mm)** | **Buoyant eggs? (0 = no, 1 = yes)** | **Scotia spawning season (1 = spring, 2 = summer, 3 = autumn, 4 = winter, 5 = year-round** |
| --- | --- | --- | --- | --- | --- | --- | --- | --- |
| *Hippoglossoides platessoides* | 86 | 6 400 | 30 | 0 | 15 298 | 3.0 | 1 | 1 |
| *Gadus morhua* | 200 | 96 000 | 25 | 0 | 1 610 435 | 1.5 | 1 | 2 |
| *Melanogrammus aeglefinus* | 112 | 16 800 | 20 | 0 | 429 756 | 1.5 | 1 | 1 |
| *Amblyraja radiata* | 105 | 11 400 | 16 | 2 | 17 | 53.5 | 0 | 5 |
| *Merluccius bilinearis* | 76 | 2 300 | 12 | 0 | 366 542 | 0.88 | 1 | 2 |
| *Glyptocephalus cynoglossus* | 60 | 2 500 | 25 | 0 | 325 000 | 1.08 | 1 | 2 |
| *Sebastes* spp. | 63 | 15 000 | 68 | 2 | 36 928 | 2.5 | 1 | 2 |
| *Limanda ferruginea* | 64 | 1 500 | 12 | 0 | 1 264 263 | 0.85 | 1 | 1 |
| *Myoxocephalus octodecemspinosus* | 46 | 973 | 11 | 1 | 8 000 | 2.1 | 0 | 4 |
| *Urophycis tenuis* | 133 | 21 000 | 23 | 0 | 3 872 984 | 0.75 | 1 | 4 |
| *Pollachius virens* | 130 | 32 000 | 25 | 0 | 1 405 952 | 1.15 | 1 | 4 |
| *Clupea harengus* | 45 | 1 050 | 22 | 0 | 30 077 | 1.74 | 0 | 2 |
| *Hemitripterus americanus* | 64 | 3 200 | 10 | 0 | 24 495 | 4.0 | 0 | 3.5 |
| *Lophius americanus* | 120 | 22 600 | 30 | 0 | 915 089 | 1.73 | 1 | 2 |
| *Squalus acanthias* | 160 | 9 100 | 75 | 2 | 10 | 45.0 | 0 | 4 |
| *Anarhichas lupus* | 150 | 23 600 | 23 | 1 | 12 740 | 6.0 | 0 | 4 |
| *Malacoraja senta* | 61 | 2 269 | 15 | 2 | 17 | 48.5 | 0 | 3 |
| *Urophycis chuss* | 66 | 3 600 | 15 | 0 | 17 | 0.74 | 1 | 2 |
| *Zoarces americanus* | 110 | 5 436 | 18 | 1 | 2 332 | 6.0 | 0 | 3 |
| *Pseudopleuronectes americanus* | 64 | 3 600 | 15 | 0 | 500 000 | 0.8 | 0 | 1 |
| *Hippoglossus hippoglossus* | 300 | 320 000 | 50 | 0 | 2 133 073 | 3.38 | 1 | 4 |
| *Triglops murrayi* | 25 | 156 | 10 | 0 | 2 320 | 2.1 | 0 | 2 |
| *Leucoraja ocellata* | 110 | 13 310 | 21 | 2 | 17 | 60.5 | 0 | 5 |
| *Argentina silus* | 84 | 460 | 29 | 0 | 19 647 | 3.25 | 1 | 1 |
| *Brosme brosme* | 120 | 30 000 | 22.1 | 0 | 2 449 490 | 1.4 | 1 | 2 |
| *Alosa pseudoharengus* | 40 | 200 | 9 | 0 | 131 453 | 1.03 | 0 | 1 |
| *Scomber scombrus* | 60 | 3 400 | 17 | 0 | 417 421 | 1.3 | 1 | 2 |
| *Enchelyopus cimbrius* | 41 | 689 | 9 | 0 | 15 000 | 0.7 | 1 | 2 |
| *Nezumi bairdii* | 40 | 741 | 11 | 0 | 32 000 | 2.35 | 1 | 3.5 |
| *Phycis chesteri* | 42 | 6 400 | 20 | 0 | 766 528 | 0.76 | 1 | 4 |

**Table S2**. Variation in six modelled life history traits among the 30 most frequently occurring marine fish species, with derived from [www.fishbase.org](http://www.fishbase.org/), as described in the text.

| **Species** | **Growth rate, *K*** | **Natural mortality, *M*** | **Length at maturity (cm)** | **Age at maturity (years)** | **Trophic level** | **Intrinsic rate of increase (rm per year)** |
| --- | --- | --- | --- | --- | --- | --- |
| *Hippoglossoides platessoides* | 0.09 | 0.13 | 29.8 | 7.1 | 3.65 | 0.4 |
| *Gadus morhua* | 0.12 | 0.16 | 48.9 | 3.4 | 4.42 | 0.46 |
| *Melanogrammus aeglefinus* | 0.12 | 0.16 | 35.2 | 5.2 | 4.09 | 0.46 |
| *Amblyraja radiata* | 0.11 | 0.18 | 65 | 5.4 | 4.02 | 0.56 |
| *Merluccius bilinearis* | 0.18 | 0.24 | 22.8 | 3.6 | 4.26 | 0.72 |
| *Glyptocephalus cynoglossus* | 0.2 | 0.3 | 28.2 | 3.4 | 3.14 | 0.9 |
| *Sebastes* spp. | 0.13 | 0.24 | 28.5 | 6.4 | 3.6 | 0.84 |
| *Limanda ferruginea* | 0.33 | 0.45 | 28.1 | 2.0 | 3.22 | 1.36 |
| *Myoxocephalus octodecemspinosus* | 0.72 | 1.03 | 17.7 | 3.0 | 3.5 | 3.1 |
| *Urophycis tenuis* | 0.11 | 0.15 | 42.6 | 5.4 | 4.2 | 0.46 |
| *Pollachius virens* | 0.17 | 0.24 | 52.4 | 3.6 | 4.38 | 0.72 |
| *Clupea harengus* | 0.31 | 0.48 | 20.6 | 2.3 | 3.23 | 1.5 |
| *Hemitripterus americanus* | 0.29 | 0.38 | 36.1 | 2.3 | 4.47 | 1.1 |
| *Lophius americanus* | 0.1 | 0.14 | 42.5 | 5.8 | 4.5 | 0.42 |
| *Squalus acanthias* | 0.07 | 0.11 | 61.5 | 8.5 | 4.3 | 0.4 |
| *Anarhichas lupus* | 0.12 | 0.16 | 54.1 | 5.1 | 3.24 | 0.46 |
| *Malacoraja senta* | 0.22 | 0.3 | 34.6 | 3.0 | 3.5 | 0.9 |
| *Urophycis chuss* | 0.19 | 0.32 | 33.1 | 3.5 | 3.64 | 1.04 |
| *Zoarces americanus* | 0.11 | 0.18 | 29.9 | 5.4 | 3.42 | 0.56 |
| *Pseudopleuronectes americanus* | 0.38 | 0.54 | 28.1 | 1.8 | 2.83 | 1.62 |
| *Hippoglossus hippoglossus* | 0.05 | 0.07 | 98.8 | 10.8 | 4.53 | 0.22 |
| *Triglops murrayi* | 0.4 | 1.07 | 15 | 2.0 | 3.46 | 2.04 |
| *Leucoraja ocellata* | 0.14 | 0.2 | 58.7 | 4.3 | 4.37 | 0.6 |
| *Argentina silus* | 0.12 | 0.19 | 29.3 | 5.6 | 3.31 | 0.6 |
| *Brosme brosme* | 0.13 | 0.19 | 47.1 | 4.8 | 4.0 | 0.58 |
| *Alosa pseudoharengus* | 0.46 | 0.91 | 14.5 | 1.7 | 3.51 | 3.24 |
| *Scomber scombrus* | 0.26 | 0.39 | 28.4 | 2.6 | 3.65 | 1.18 |
| *Enchelyopus cimbrius* | 0.2 | 0.35 | 20.9 | 3.5 | 3.5 | 1.14 |
| *Nezumia bairdii* | 0.26 | 0.42 | 23.8 | 2.7 | 3.6 | 1.32 |
| *Phycis chesteri* | 0.36 | 0.5 | 24.9 | 2.0 | 3.17 | 1.5 |
